# Supplementary material for: Site-specific catalytic activities to facilitate solvent-free aerobic oxidation of cyclohexylamine to cyclohexanone oxime over highly efficient Nb-modified SBA-15 catalysts
Source: Royal Society of Chemistry journal article supplement (doi:10.1039/d0cy00479k), 2020-01-01
Supplement: d0cy00479k1.pdf [file d0cy00479k1.pdf]

## Supplementary data

# Site-specific catalytic activities to facilitate solvent-free aerobic oxidation of cyclohexylamine to cyclohexanone oxime over highly efficient Nb-modified SBA-15 catalysts

Wei Ding, Haoyu Peng, Wenzhou Zhong\*, Liqui Mao\*, Dulin Yin

National & Local United Engineering Laboratory for New Petrochemical Materials & Fine Utilization of

Resources, Hunan Normal University, Changsha 410081, P. R. China. E-mail: zwenz79@163.com,

mlq1010@126.com; Tel: +86-731 88872576; Fax: +86-731-88872531

Table S1 Some XPS features of samples with different Nb contents.

| Catalyst                       | Binding energy [eV] |        |                      |                      | Nb/Si atomic ratio     |                     |
|--------------------------------|---------------------|--------|----------------------|----------------------|------------------------|---------------------|
|                                | O 1s                | Si 2p  | Nb 3d <sub>3/2</sub> | Nb 3d <sub>5/2</sub> | Surface <sup>[a]</sup> | Bulk <sup>[b]</sup> |
| SBA-15                         | 533.02              | 103.83 | -                    | -                    | -                      | -                   |
| Nb/SBA-15/1im                  | 533.40              | 104.21 | 210.58               | 208.49               | 0.011                  | 0.010               |
| Nb/SBA-15/3im                  | 533.55              | 103.97 | 210.48               | 207.94               | 0.029                  | 0.030               |
| Nb/SBA-15/5im                  | 533.48              | 103.94 | 210.78               | 208.06               | 0.043                  | 0.046               |
| Nb/SBA-15/3co                  | 533.56              | 103.56 | 210.78               | 207.97               | 0.016                  | 0.083               |
| Nb <sub>2</sub> O <sub>5</sub> | 530.2               | -      | 209.61               | 207.02               | -                      | -                   |

[a] Determined by XPS analysis. [b] Determined by X-ray fluorescence.

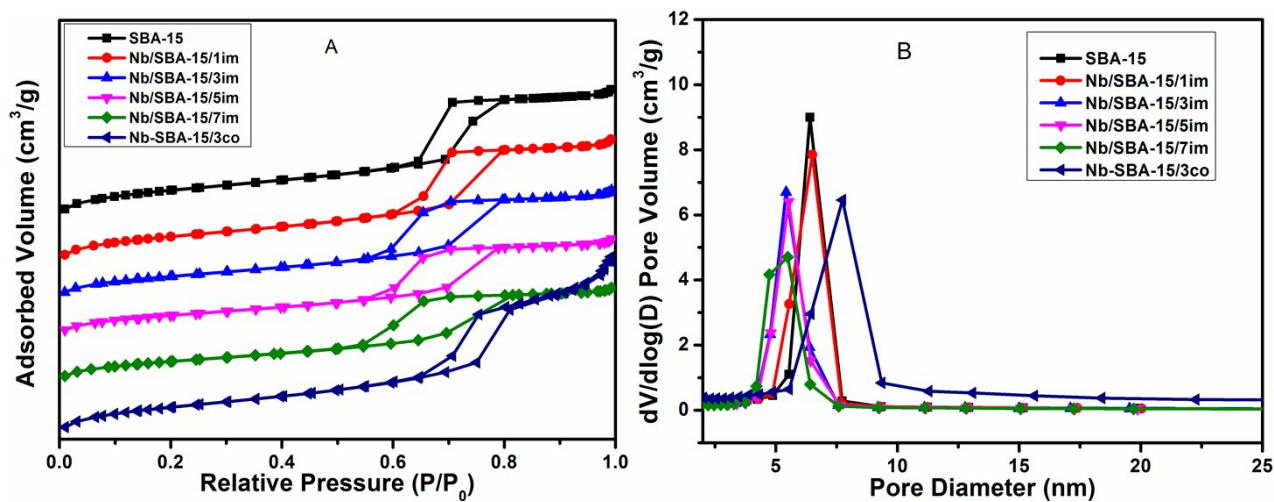

Fig. S1.  $N_2$  adsorption-desorption isotherms (A) and pore diameter distribution (B) of samples.

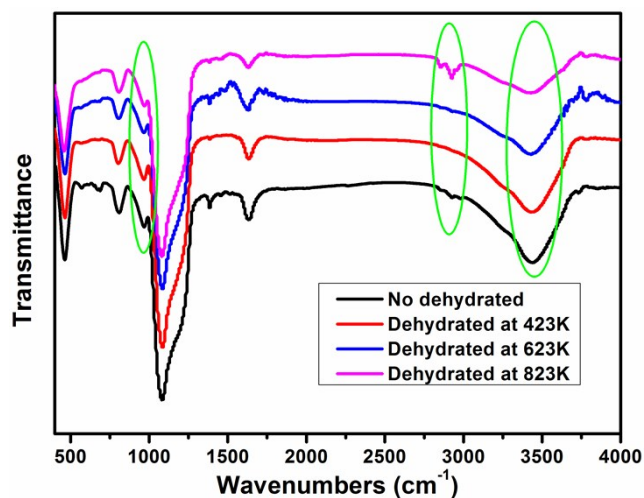

Fig. S2 FT-IR spectra of Nb/SBA-15/3im samples at at different dehydration temperatures.

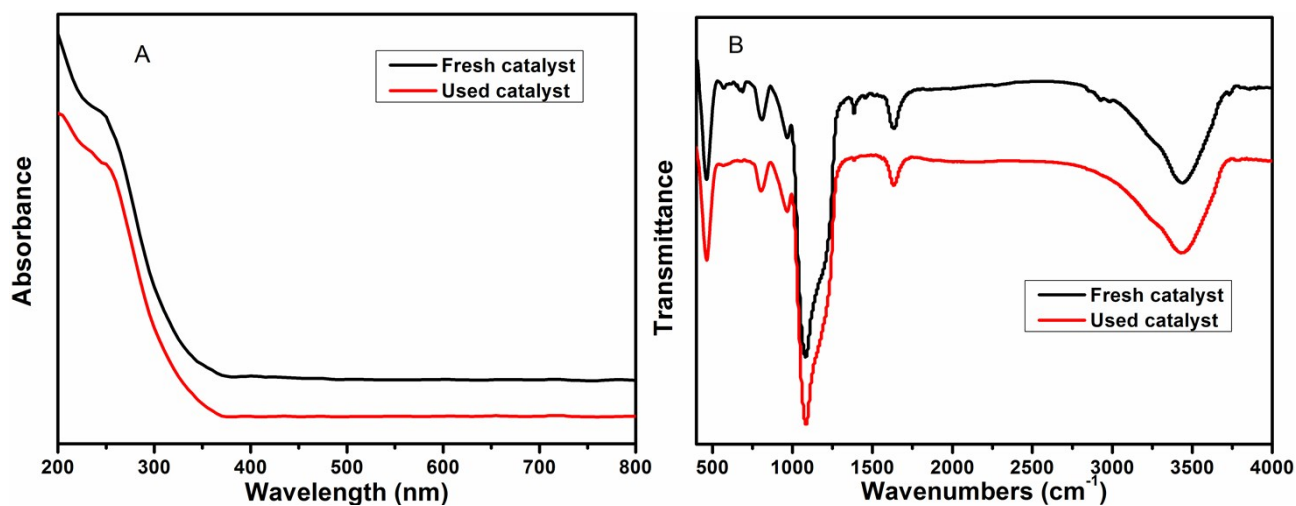

Fig. S3 Diffuse reflectance UV-Vis (A) and FT-IR spectra (B) of the fresh and used Nb/SBA-15/3im catalysts.



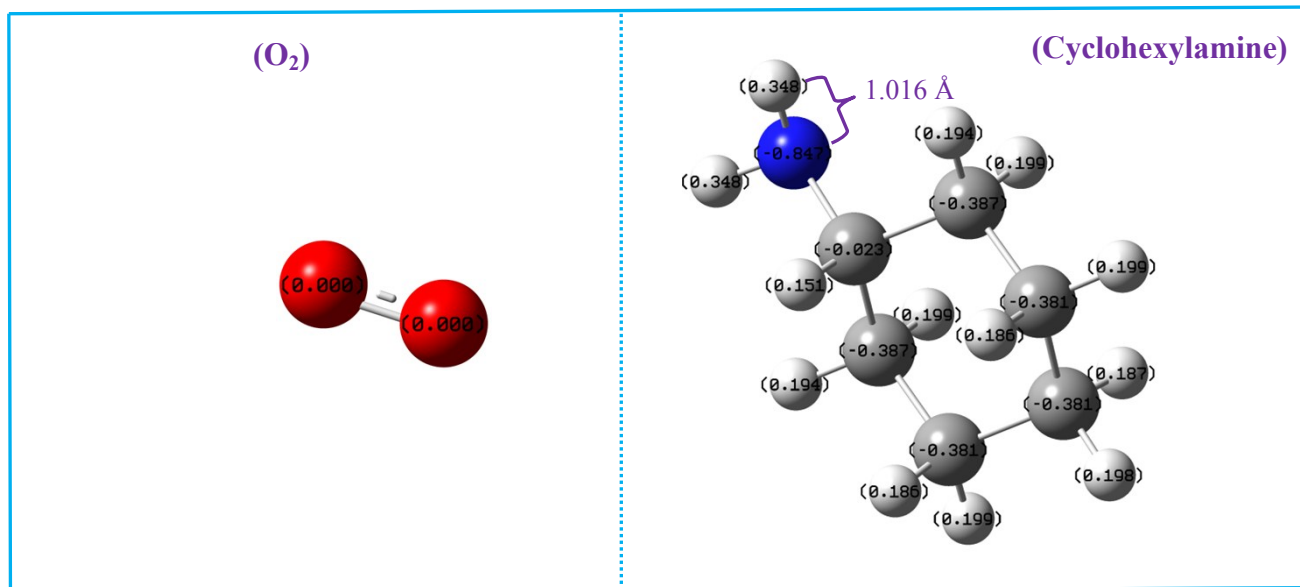

Fig. S5 Computational structures of oxygen (a) and cyclohexylamine (b).

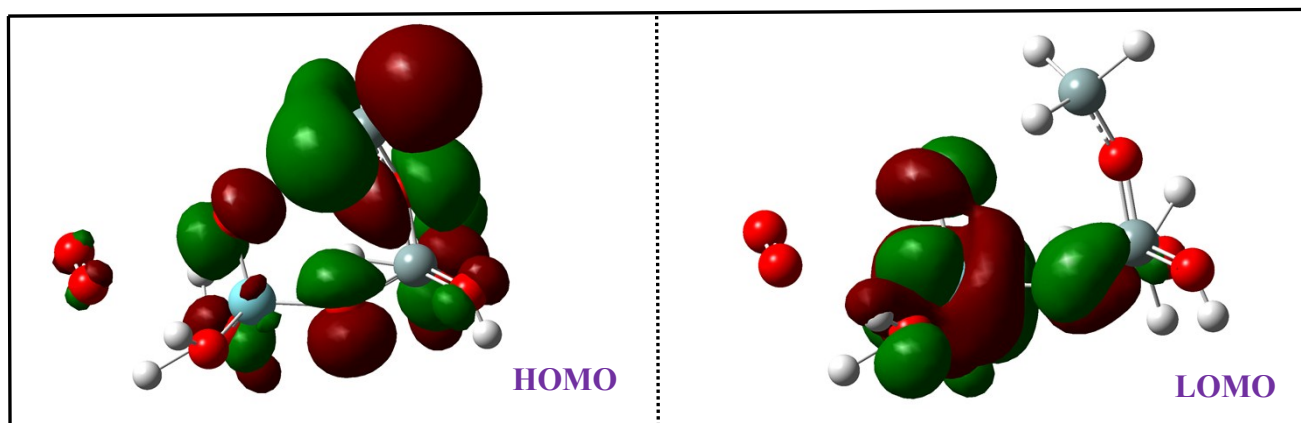

Fig. S6 The HOMO and LOMO orbitals of optimized models for the isolated Nb species grafted onto SBA-15 surface (a-o) with the interactions between O<sub>2</sub> and the redox Nb sites.
